# Supplementary material for: Facile synthesis of high-entropy alloy nanoparticles on germanane, Ge nanoparticles and wafers
Source: Royal Society of Chemistry journal article supplement (doi:10.1039/d3nh00178d), 2023-01-01
Supplement: d3nh00178d1.pdf [file d3nh00178d1.pdf]

## Electronic Supplementary Information for

# Facile Synthesis of High-entropy Alloy Nanoparticles on Germanane, Ge Nanoparticles and Wafers

Chuyi Ni,<sup>a</sup> Kevin M. O'Connor,<sup>a</sup> Jonathan Trach,<sup>a</sup> Cole Butler,<sup>a</sup> Bernhard Rieger,<sup>b</sup> and Jonathan G. C. Veinot<sup>\*a</sup>

<sup>a</sup>Department of Chemistry, University of Alberta, Edmonton, Alberta T6G 2G2, Canada

<sup>b</sup>WACKER-Chair of Macromolecular Chemistry, Catalysis Research Center, Technical University Munich, Lichtenbergstraße 4, 85748 Garching, Germany

## Table of Contents

|                                                                                                                                                                                                                                                                                                                    |   |
|--------------------------------------------------------------------------------------------------------------------------------------------------------------------------------------------------------------------------------------------------------------------------------------------------------------------|---|
| <b>Figure S1.</b> Photograph of the reaction forming HEA NPs@GeNSs showing evolution of hydrogen bubbles. ....                                                                                                                                                                                                     | 3 |
| <b>Figure S2.</b> XRD patterns of (a) HEA NPs@GeNSs (red trace) and GeNSs (black trace). (b) A comparison of laboratory-based XRD patterns of M@GeNSs and HEA NPs@GeNSs from 37° to 45°. (*) correspond to reflections arising from bulk Ge impurities. ....                                                       | 3 |
| <b>Figure S3.</b> XRD patterns and corresponding fitting results for (a) LaB6 standard sample, and (b) the (111) reflection in the laboratory-based X-ray diffraction pattern for HEA NPs@GeNSs corresponding to an HEA nanocrystal domain size of 5.5 nm. ....                                                    | 4 |
| <b>Figure S4.</b> Synchrotron XRD ( $\lambda = 0.40867 \text{ \AA}$ ) pattern of HEA NPs@GeNSs exhibiting the (111) reflections from the HEA NPs and other intense reflections from GeNSs. ....                                                                                                                    | 4 |
| <b>Figure S5.</b> Representative FTIR spectra of GeNSs before (black) and after (red) HEA NPs deposition. ....                                                                                                                                                                                                     | 5 |
| <b>Figure S6.</b> Representative survey XP spectrum of HEA NPs@GeNSs. ....                                                                                                                                                                                                                                         | 5 |
| <b>Table S1.</b> Summary of XPS data for HEA NPs@GeNSs. ....                                                                                                                                                                                                                                                       | 6 |
| <b>Figure S7.</b> Representative high-resolution XP spectra of HEA NPs@GeNSs: (a) Ge 3d, (b) Au 4f, (c) Ag 3d, (d) Cu 3d, (e) Pd 3d and (f) Pt 4f regions. ....                                                                                                                                                    | 6 |
| <b>Figure S8.</b> Representative (a) brightfield TEM image of HEA NPs@GeNSs and the associated (b) average shifted histogram for HEA particles on GeNSs. ....                                                                                                                                                      | 7 |
| <b>Figure S9.</b> Representative EDX spectrum for HEA NPs@GeNSs. ....                                                                                                                                                                                                                                              | 7 |
| <b>Figure S10.</b> (a) Laboratory XRD patterns of liberated HEA NPs (red trace) and corresponding HEA NPs@GeNSs (black trace). (b) Fitting results of the (111) reflection in the laboratory-based X-ray diffraction pattern for liberated HEA NPs corresponding to an HEA nanocrystal domain size of 6.1 nm. .... | 8 |
| <b>Figure S11.</b> XRD peak broadening distribution for liberated HEA NPs. ....                                                                                                                                                                                                                                    | 8 |
| <b>Figure S12.</b> Representative survey XP spectrum of liberated HEA NPs. ....                                                                                                                                                                                                                                    | 9 |
| <b>Figure S13.</b> Representative high-resolution XP spectra of liberated HEA NPs: (a) Ge 3d, (b) Au 4f, (c) Ag 3d, (d) Cu 3d, (e) Pd 3d and (f) Pt 4f regions. ....                                                                                                                                               | 9 |

|                                                                                                                                                                                                                                                                                                                                                 |    |
|-------------------------------------------------------------------------------------------------------------------------------------------------------------------------------------------------------------------------------------------------------------------------------------------------------------------------------------------------|----|
| <b>Table S2.</b> Summary of XPS data for liberated HEA NPs. ....                                                                                                                                                                                                                                                                                | 10 |
| <b>Figure S14.</b> Representative (a) brightfield TEM image of HEA NPs and the associated (b) average shifted histogram.....                                                                                                                                                                                                                    | 10 |
| <b>Figure S15.</b> Representative HAADF-STEM images and EDX mapping of liberated HEA NPs. ....                                                                                                                                                                                                                                                  | 11 |
| <b>Figure S16.</b> Representative EDX spectrum for HEA NPs liberated from GeNSs. ....                                                                                                                                                                                                                                                           | 11 |
| <b>Figure S17.</b> Photography of the HEA NPs@GeNPs (a) before and (b) after the addition of the mixed metal ions solution. ....                                                                                                                                                                                                                | 12 |
| <b>Figure S18.</b> (a) Laboratory XRD pattern of HEA NPs@GeNPs (black trace). Characteristic reflections for bulk Ge (PDF# 79-0001) are provided for reference. (b) Fitting results of the (111) reflection in the laboratory-based X-ray diffraction pattern for HEA NPs@GeNPs corresponding to an HEA nanocrystal domain size of 7.2 nm. .... | 12 |
| <b>Figure S19.</b> Representative FTIR spectrum of HEA NPs@GeNPs.....                                                                                                                                                                                                                                                                           | 13 |
| <b>Figure S20.</b> Representative survey XP spectrum of HEA NPs@GeNPs.....                                                                                                                                                                                                                                                                      | 13 |
| <b>Figure S21.</b> Representative high-resolution XP spectra of HEA NPs@GeNPs: (a) Ge 3d, (b) Au 4f, (c) Ag 3d, (d) Cu 3d, (e) Pd 3d and (f) Pt 4f regions. ....                                                                                                                                                                                | 14 |
| <b>Table S3.</b> Summary of XPS data for HEA NPs@GeNPs. ....                                                                                                                                                                                                                                                                                    | 14 |
| <b>Figure S22.</b> Representative (a) brightfield TEM image of HEA NPs@GeNPs and (b) average shifted histogram for HEA particles on GeNPs. ....                                                                                                                                                                                                 | 15 |
| <b>Figure S23.</b> Representative EDX spectrum for HEA NPs@GeNPs.....                                                                                                                                                                                                                                                                           | 15 |
| <b>Figure S24.</b> (a) Schematic illustration of the deposition of the HEA NPs on Ge(100) wafer. (b) XRD patterns of HEA NPs-Ge wafer and Ge(100) wafer.....                                                                                                                                                                                    | 16 |
| <b>Figure S25.</b> Representative (a) SEM image of HEA NPs-Ge wafer and (b) average shifted histogram for HEA NPs. ....                                                                                                                                                                                                                         | 16 |
| <b>Figure S26.</b> Representative SEM/EDX spectrum for HEA NPs-Ge wafer. ....                                                                                                                                                                                                                                                                   | 17 |
| <b>Figure S27.</b> (a) Representative SEM image and (b-h) EDX mapping for HEA NPs-Ge wafer.....                                                                                                                                                                                                                                                 | 17 |
| <b>Figure S28.</b> Representative survey XP spectrum of HEA NPs-Ge wafer. ....                                                                                                                                                                                                                                                                  | 18 |
| <b>Figure S29.</b> Representative high-resolution XP spectra of HEA NPs-Ge wafer: (a) Ge 3d, (b) Au 4f, (c) Ag 3d, (d) Cu 3d, (e) Pd 3d and (f) Pt 4f regions. ....                                                                                                                                                                             | 18 |
| <b>Table S4.</b> Summary of XPS data for HEA NPs-Ge wafer.....                                                                                                                                                                                                                                                                                  | 19 |
| <b>References</b> .....                                                                                                                                                                                                                                                                                                                         | 19 |

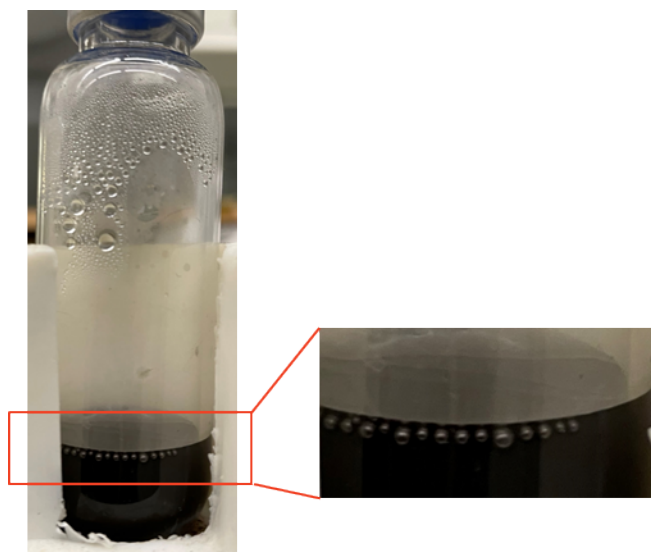

**Figure S1.** Photograph of the reaction forming HEA NPs@GeNSs showing evolution of hydrogen bubbles.

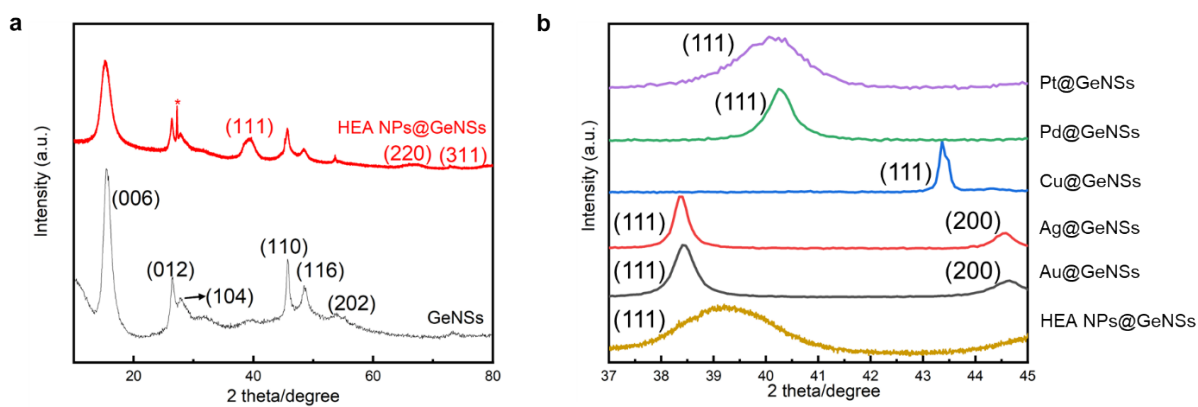

**Figure S2.** XRD patterns of (a) HEA NPs@GeNSs (red trace) and GeNSs (black trace). (b) A comparison of laboratory-based XRD patterns of M@GeNSs and HEA NPs@GeNSs from 37° to 45°. (\*) correspond to reflections arising from bulk Ge impurities.

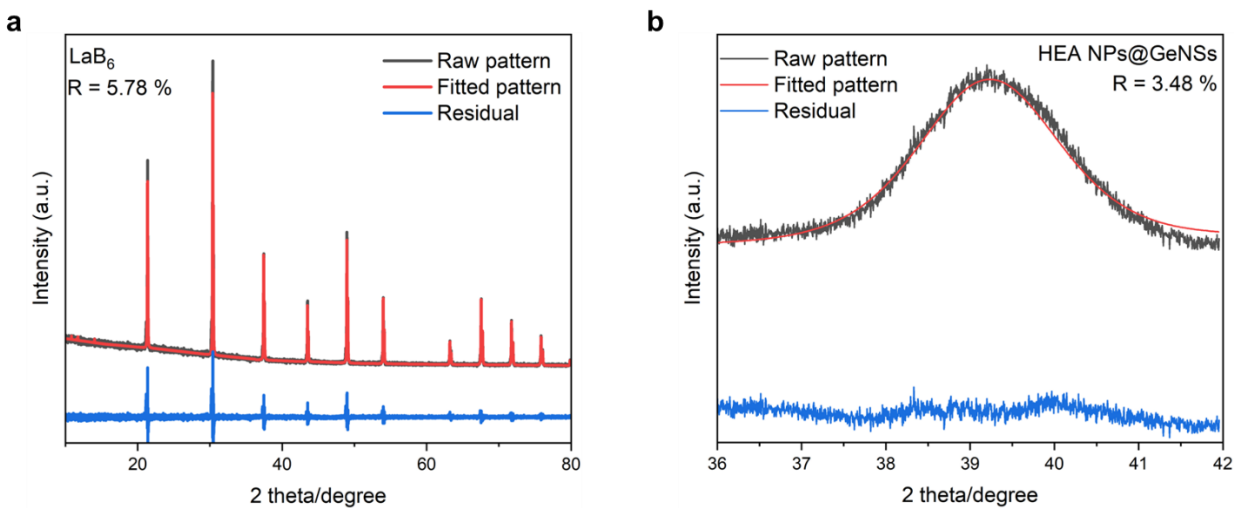

**Figure S3.** XRD patterns and corresponding fitting results for (a) LaB<sub>6</sub> standard sample, and (b) the (111) reflection in the laboratory-based X-ray diffraction pattern for HEA NPs@GeNSs corresponding to an HEA nanocrystal domain size of 5.5 nm.

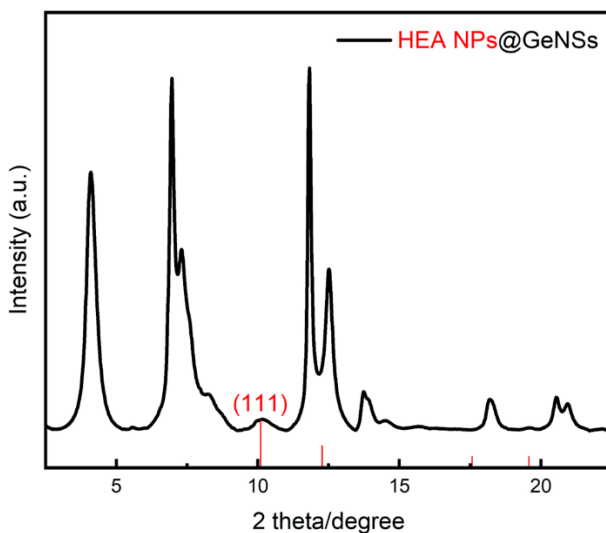

**Figure S4.** Synchrotron XRD ( $\lambda = 0.40867 \text{ \AA}$ ) pattern of HEA NPs@GeNSs exhibiting the (111) reflections from the HEA NPs and other intense reflections from GeNSs.

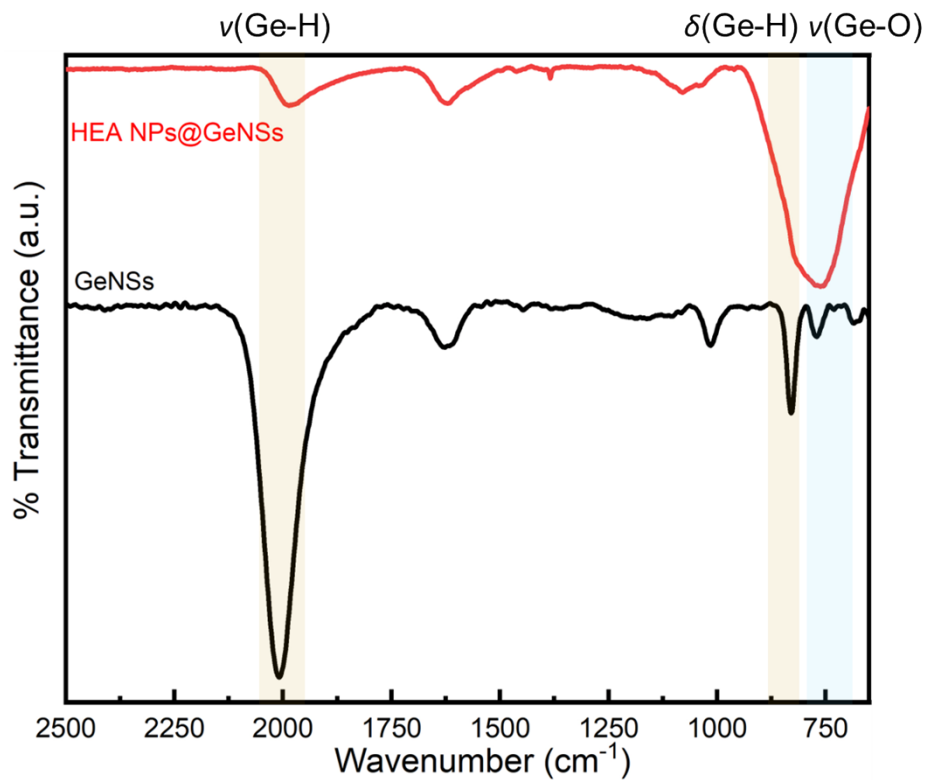

**Figure S5.** Representative FTIR spectra of GeNSs before (black) and after (red) HEA NPs deposition.

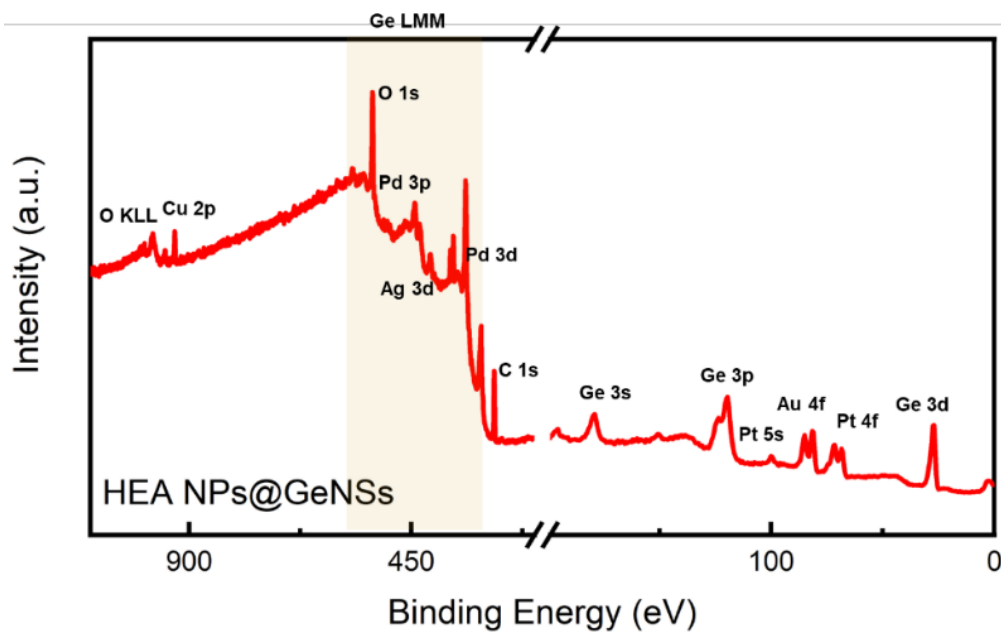

**Figure S6.** Representative survey XPS spectrum of HEA NPs@GeNSs.

**Table S1.** Summary of XPS data for HEA NPs@GeNSs

|                                      | Ge 3d | Au 4f | Ag 3d | Cu 2p | Pd 3d | Pt 4f |
|--------------------------------------|-------|-------|-------|-------|-------|-------|
| Emission (eV)                        | 29.8  | 83.9  | 367.9 | 932.5 | 335.2 | 71.0  |
| Reference emission (eV) <sup>a</sup> | 29.8  | 84.0  | 368.2 | 933.0 | 335.0 | 71.0  |
| Atomic percentage (%)                | 20.7  | 1.94  | 2.03  | 2.16  | 2.17  | 1.99  |

<sup>a</sup> Reference metal emissions are from NIST X-ray Photoelectron Spectroscopy Database.<sup>1</sup>

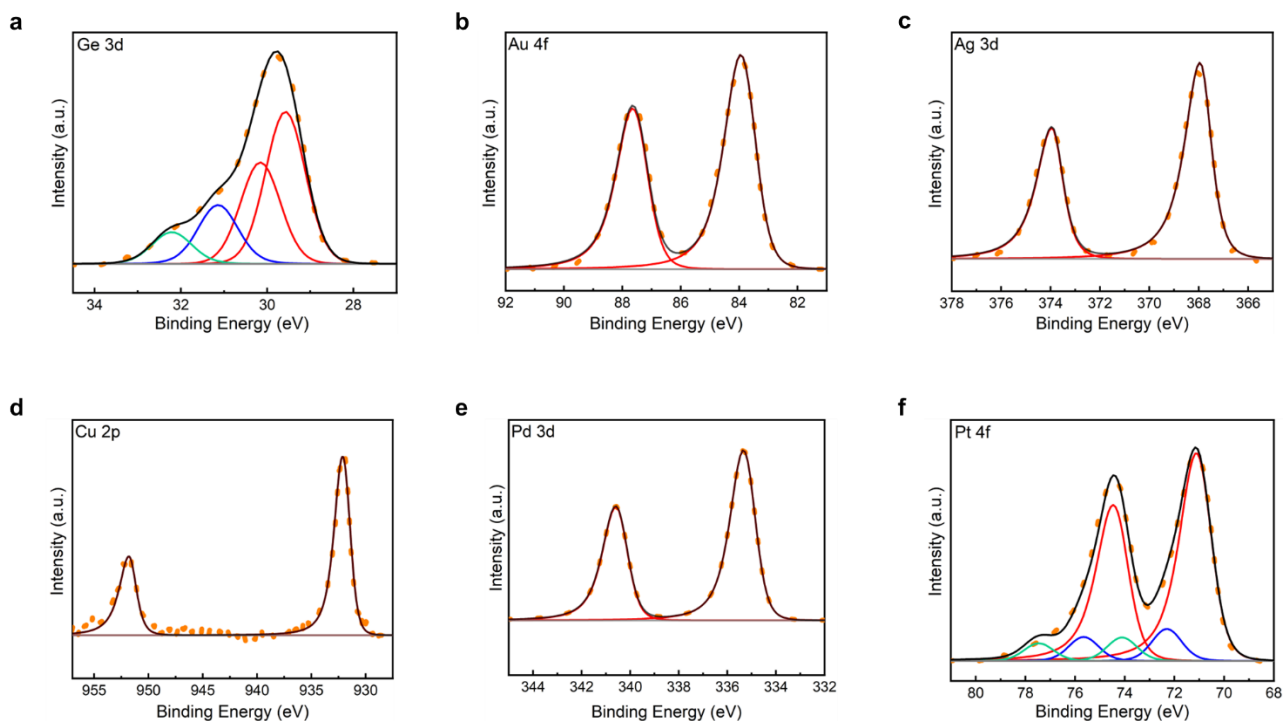

**Figure S7.** Representative high-resolution XP spectra of HEA NPs@GeNSs: (a) Ge 3d, (b) Au 4f, (c) Ag 3d, (d) Cu 3d, (e) Pd 3d and (f) Pt 4f regions.

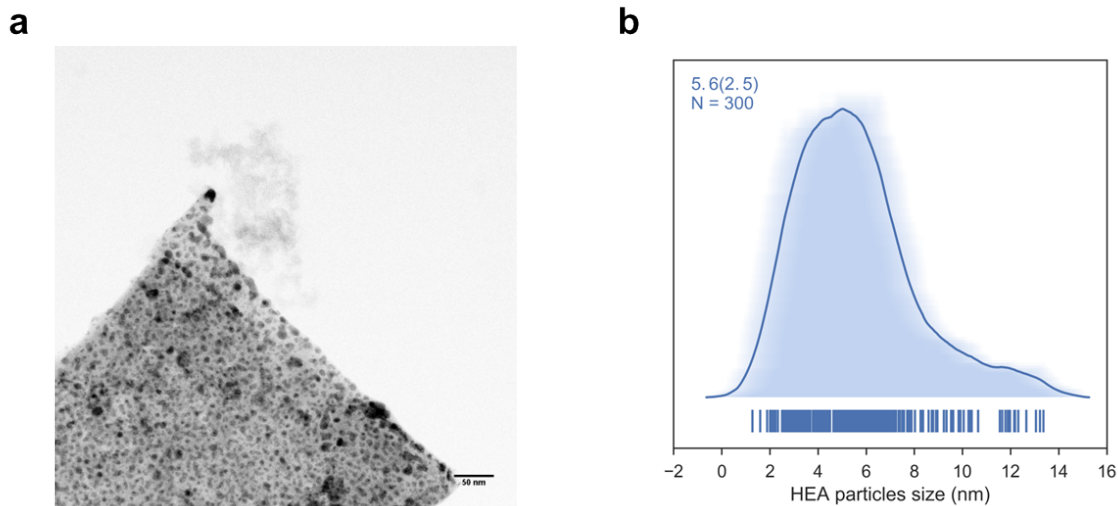

**Figure S8.** Representative (a) brightfield TEM image of HEA NPs@GeNSs and the associated (b) average shifted histogram for HEA particles on GeNSs.

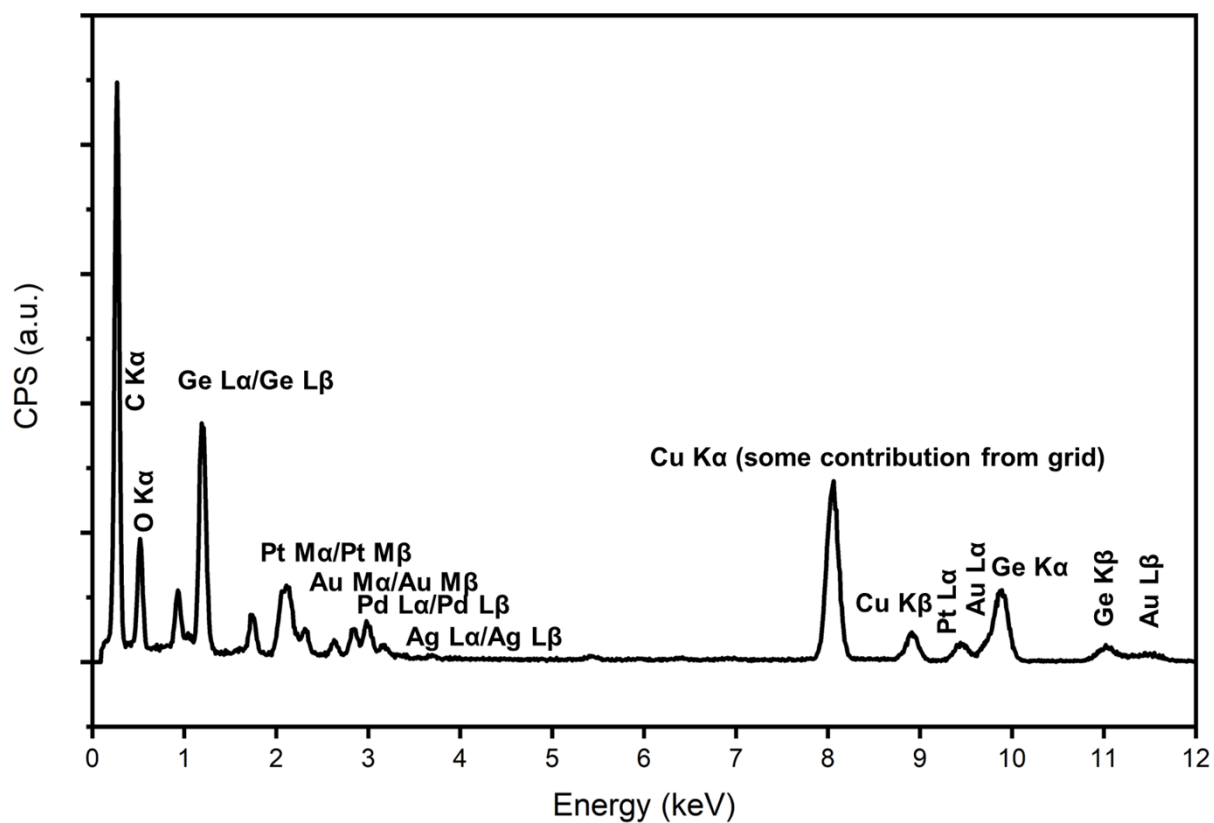

**Figure S9.** Representative EDX spectrum for HEA NPs@GeNSs.

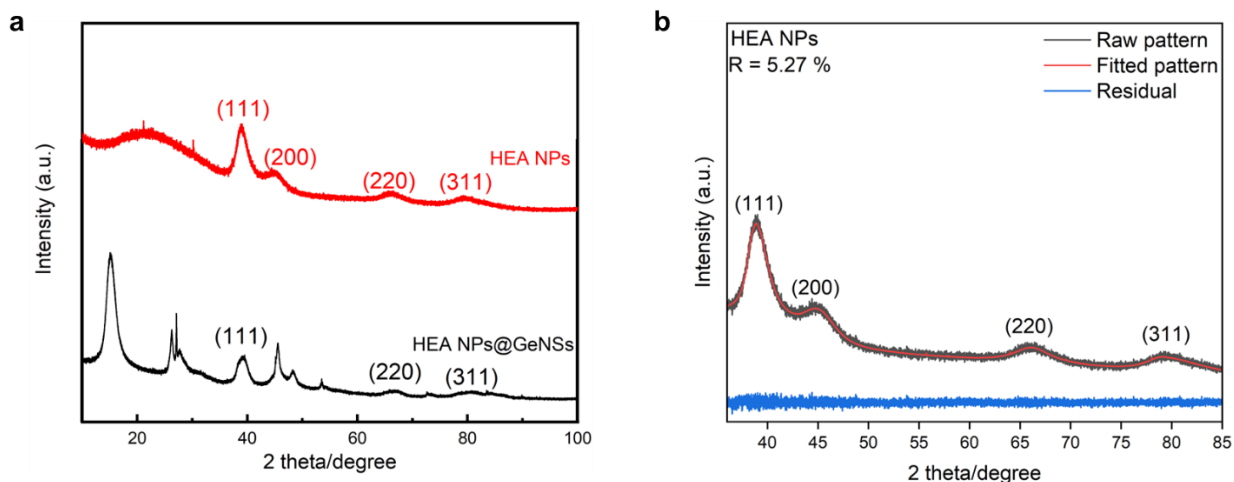

**Figure S10.** (a) Laboratory XRD patterns of liberated HEA NPs (red trace) and corresponding HEA NPs@GeNSs (black trace). (b) Fitting results of the (111) reflection in the laboratory-based X-ray diffraction pattern for liberated HEA NPs corresponding to an HEA nanocrystal domain size of 6.1 nm.

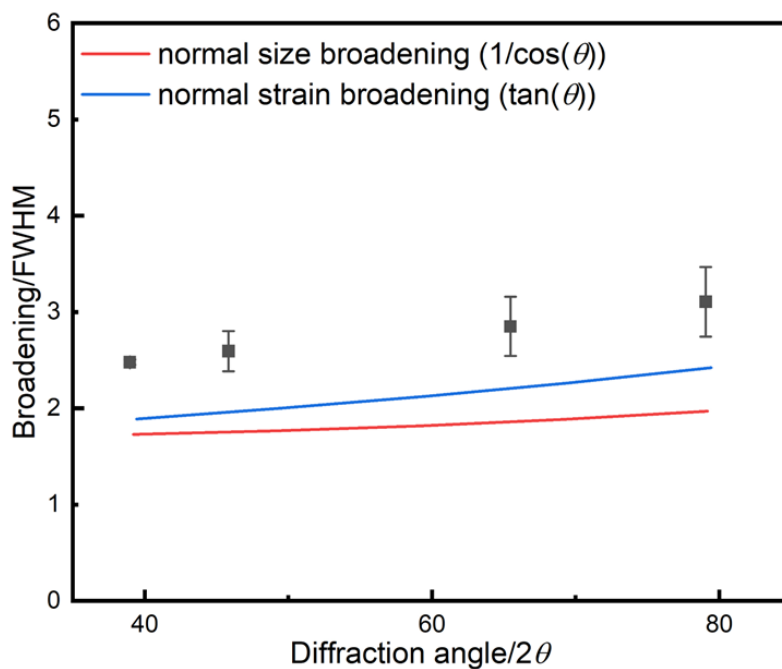

**Figure S11.** XRD peak broadening distribution for liberated HEA NPs.



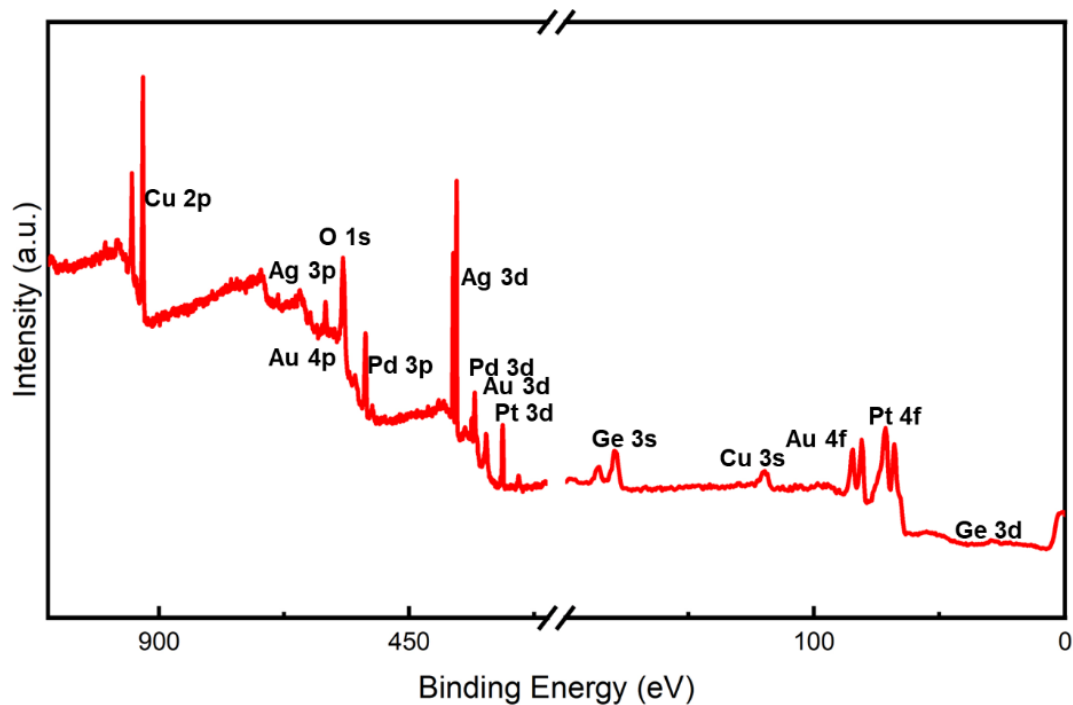

**Figure S12.** Representative survey XP spectrum of liberated HEA NPs.

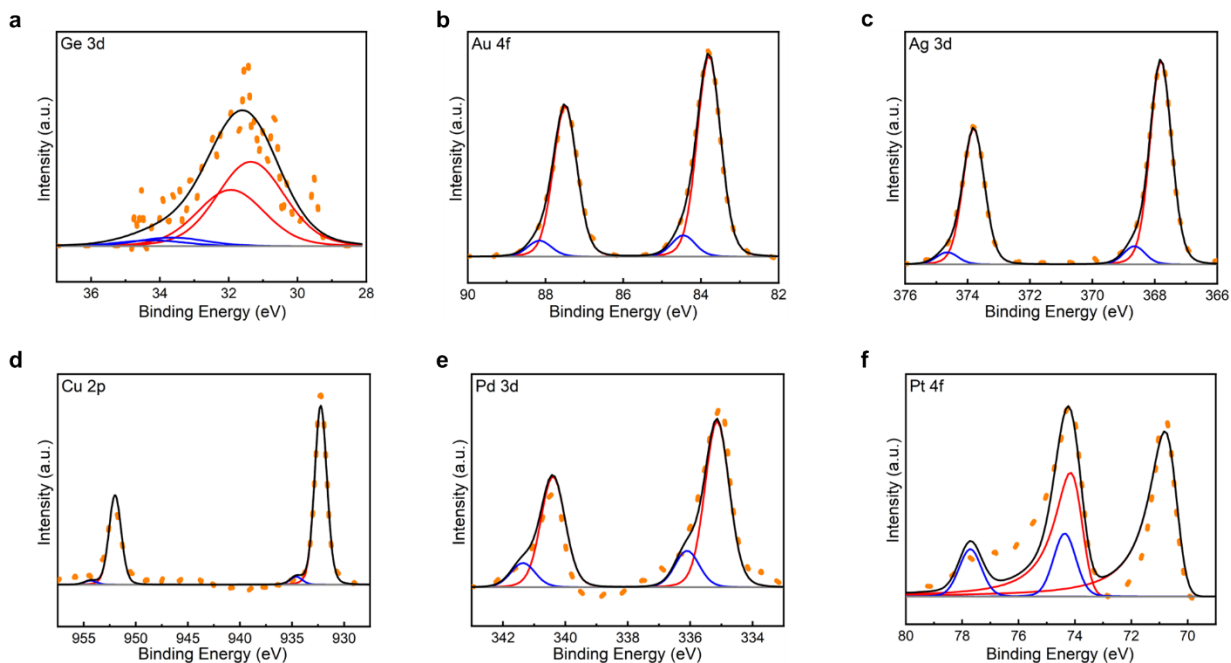

**Figure S13.** Representative high-resolution XP spectra of liberated HEA NPs: (a) Ge 3d, (b) Au 4f, (c) Ag 3d, (d) Cu 3d, (e) Pd 3d and (f) Pt 4f regions.

**Table S2.** Summary of XPS data for liberated HEA NPs.

|                                         | Ge 3d | Au 4f | Ag 3d | Cu 2p | Pd 3d | Pt 4f |
|-----------------------------------------|-------|-------|-------|-------|-------|-------|
| Emission (eV)                           | 31.3  | 83.7  | 367.8 | 932.4 | 335.1 | 70.9  |
| Reference<br>emission (eV) <sup>a</sup> | 29.8  | 84.0  | 368.2 | 933.0 | 335.0 | 71.0  |
| Atomic<br>percentage (%)                | 1.72  | 14.35 | 13.99 | 14.27 | 13.51 | 14.86 |

<sup>a</sup> Reference metal emissions are from NIST X-ray Photoelectron Spectroscopy Database.<sup>1</sup>

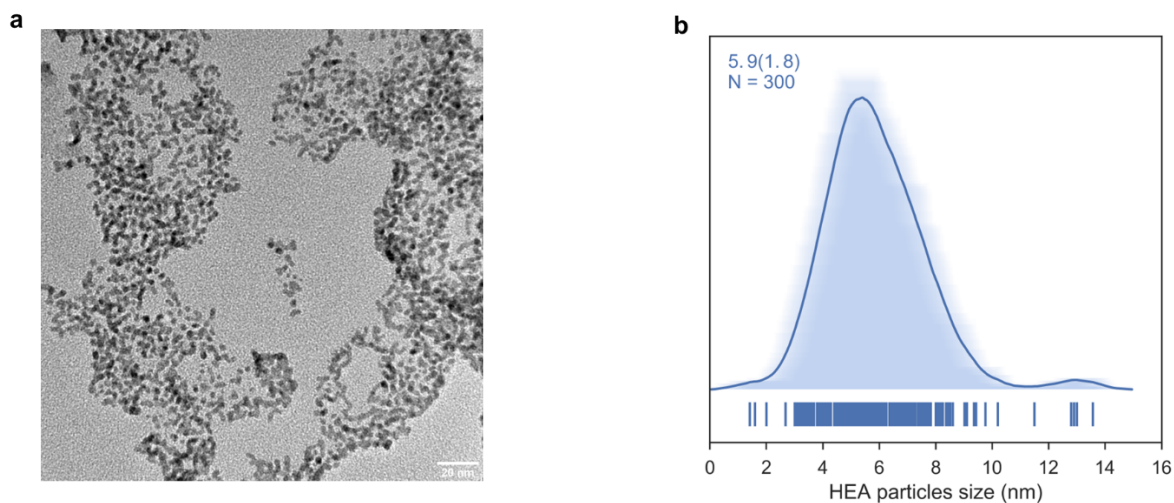

**Figure S14.** Representative (a) brightfield TEM image of HEA NPs and the associated (b) average shifted histogram.

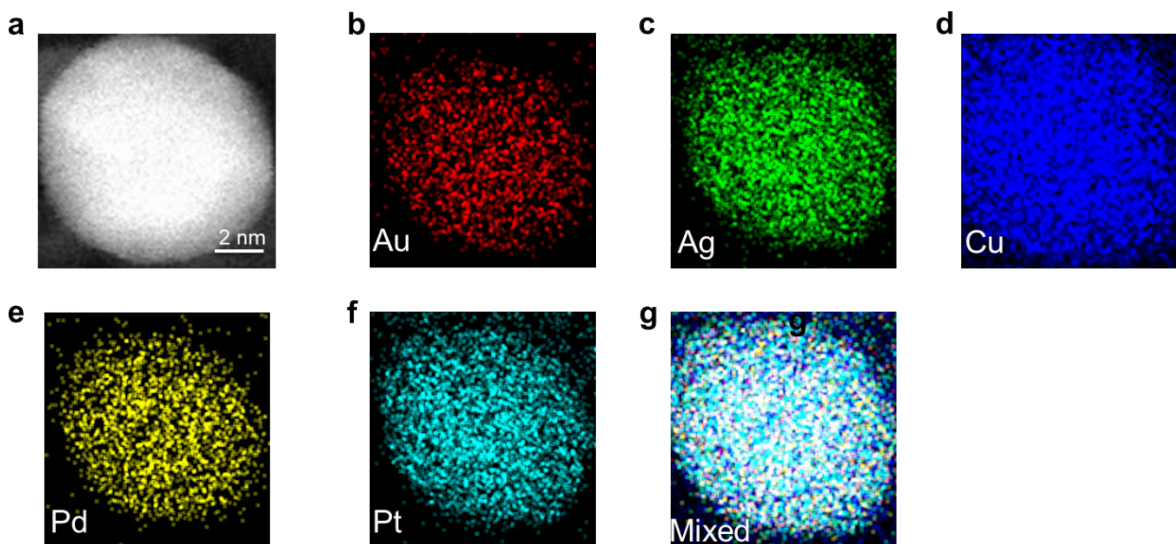

**Figure S15.** Representative HAADF-STEM images and EDX mapping of liberated HEA NPs.

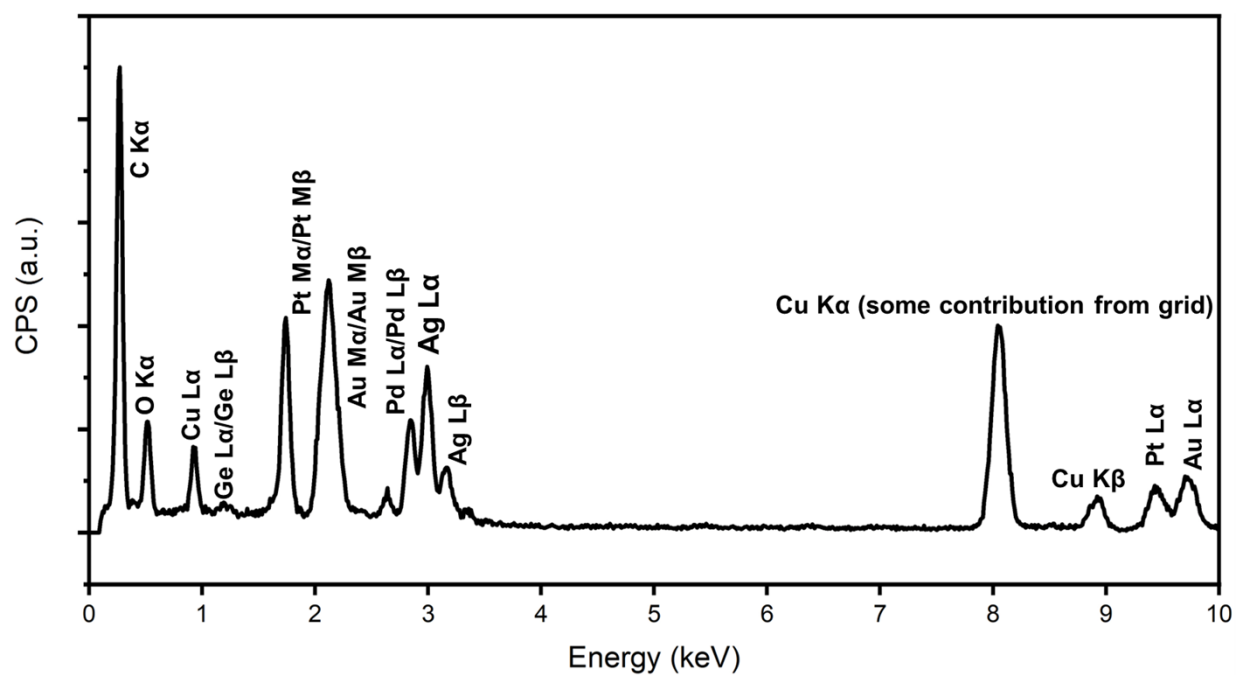

**Figure S16.** Representative EDX spectrum for HEA NPs liberated from GeNSs.

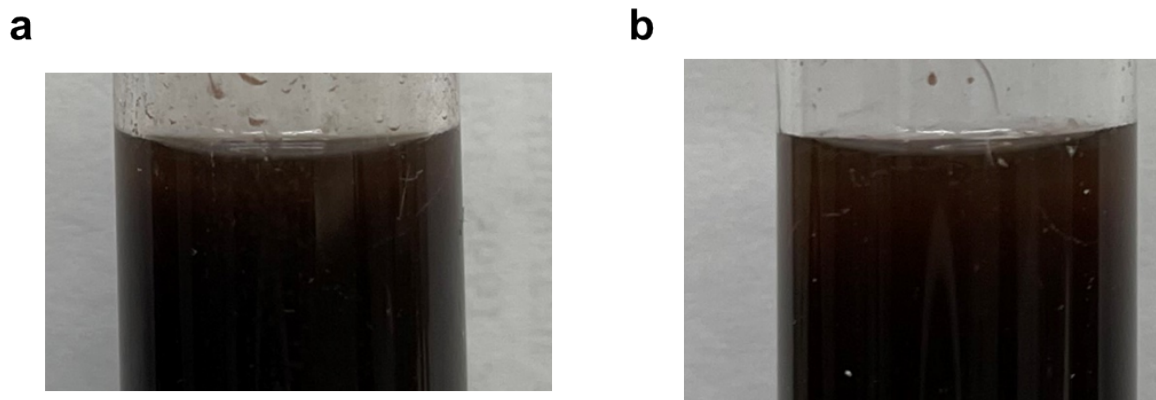

**Figure S17.** Photography of the HEA NPs@GeNPs (a) before and (b) after the addition of the mixed metal ions solution.

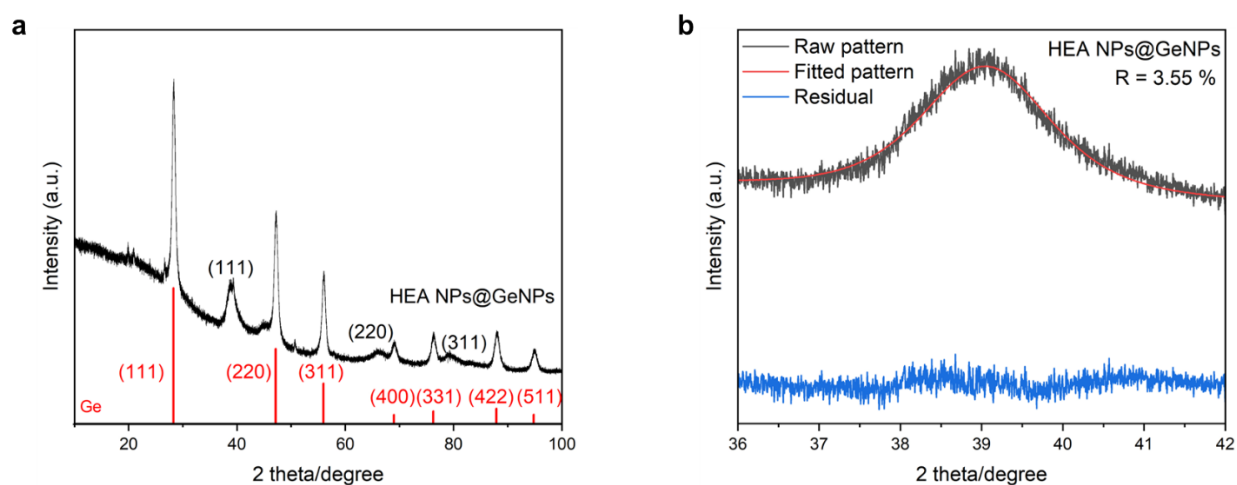

**Figure S18.** (a) Laboratory XRD pattern of HEA NPs@GeNPs (black trace). Characteristic reflections for bulk Ge (PDF# 79-0001) are provided for reference. (b) Fitting results of the (111) reflection in the laboratory-based X-ray diffraction pattern for HEA NPs@GeNPs corresponding to an HEA nanocrystal domain size of 7.2 nm.

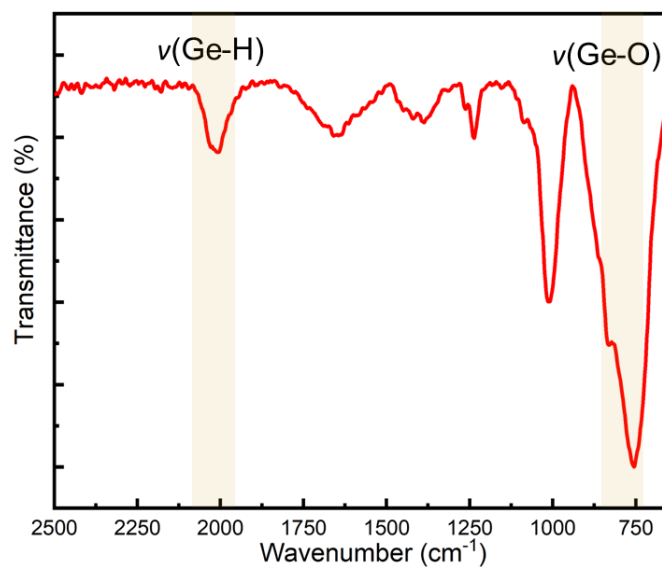

**Figure S19.** Representative FTIR spectrum of HEA NPs@GeNPs.

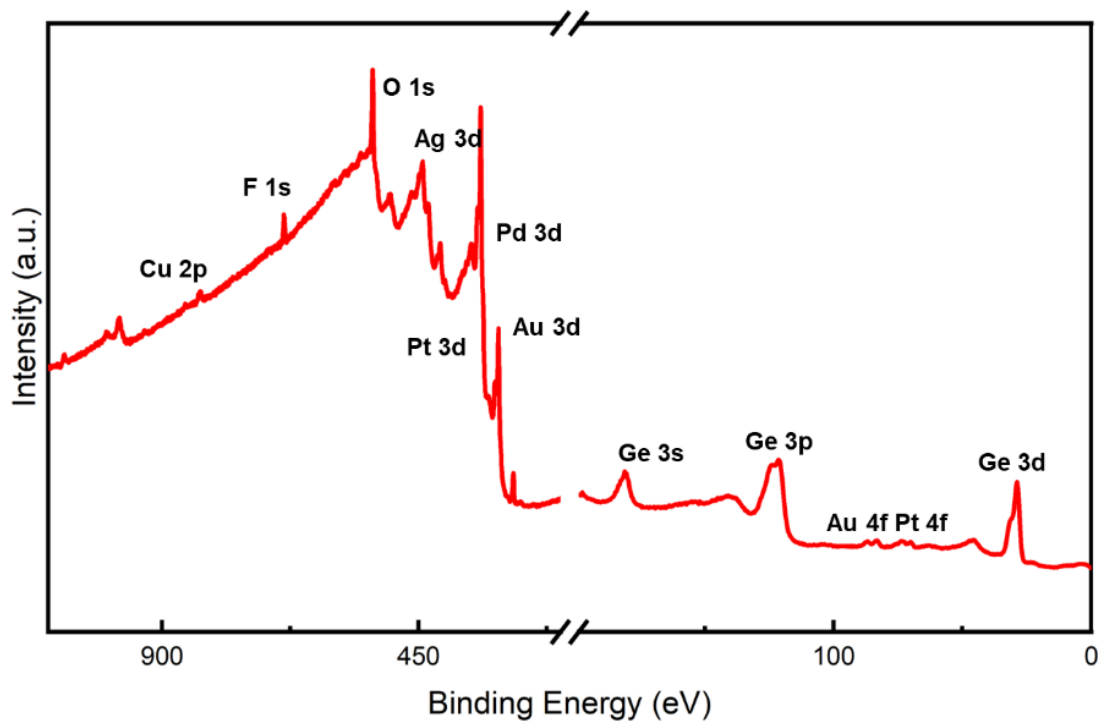

**Figure S20.** Representative survey XPS spectrum of HEA NPs@GeNPs.

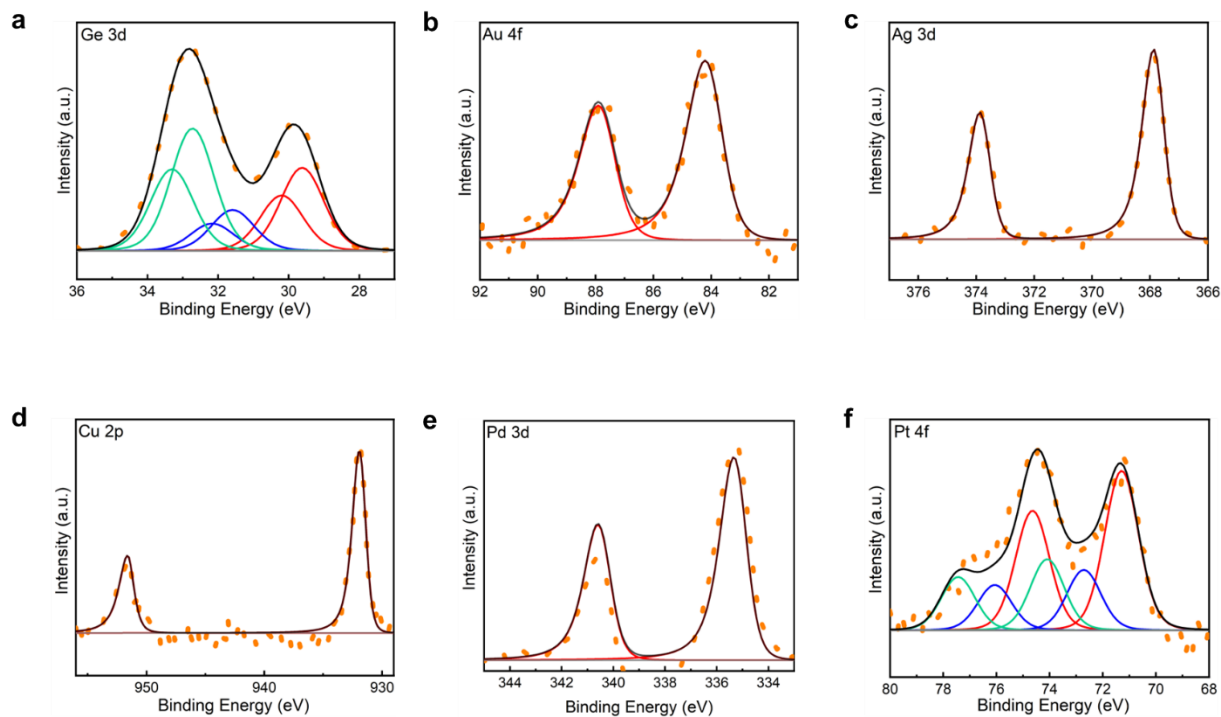

**Figure S21.** Representative high-resolution XPS spectra of HEA NPs@GeNPs: (a) Ge 3d, (b) Au 4f, (c) Ag 3d, (d) Cu 3d, (e) Pd 3d and (f) Pt 4f regions.

**Table S3.** Summary of XPS data for HEA NPs@GeNPs.

|                                      | Ge 3d | Au 4f | Ag 3d | Cu 2p | Pd 3d | Pt 4f |
|--------------------------------------|-------|-------|-------|-------|-------|-------|
| Emission (eV)                        | 29.6  | 84.0  | 367.9 | 932.3 | 335.1 | 71.0  |
| Reference emission (eV) <sup>a</sup> | 29.6  | 84.0  | 368.2 | 933.0 | 335.0 | 71.0  |
| Atomic percentage (%)                | 24.6  | 0.86  | 1.01  | 0.96  | 0.87  | 0.99  |

<sup>a</sup> Reference metal emissions are from NIST X-ray Photoelectron Spectroscopy Database.<sup>1</sup>

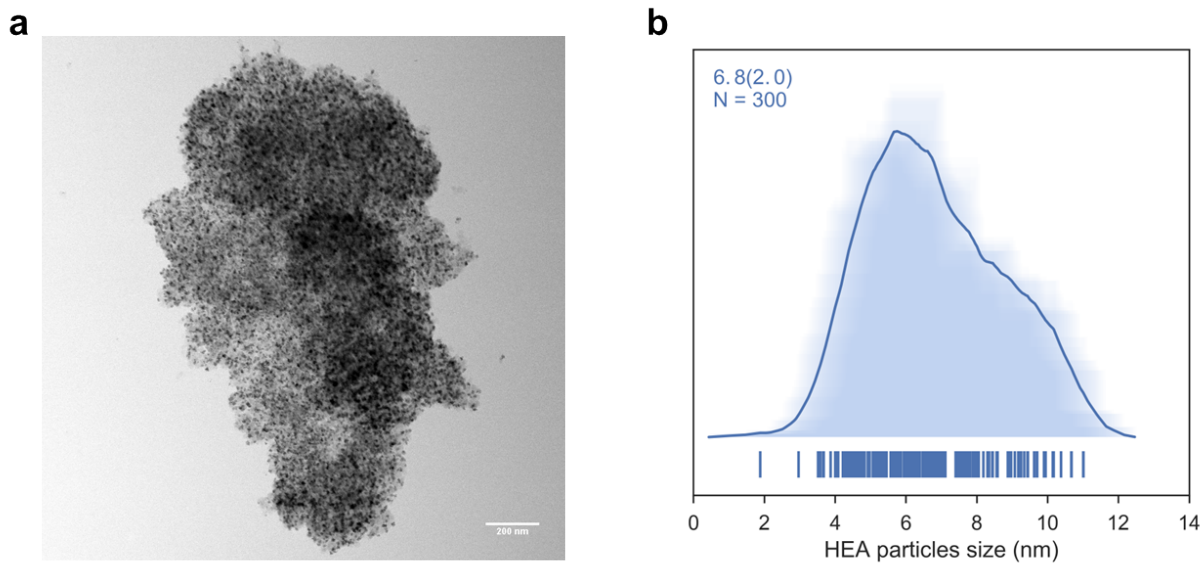

**Figure S22.** Representative (a) brightfield TEM image of HEA NPs@GeNPs and (b) average shifted histogram for HEA particles on GeNPs.

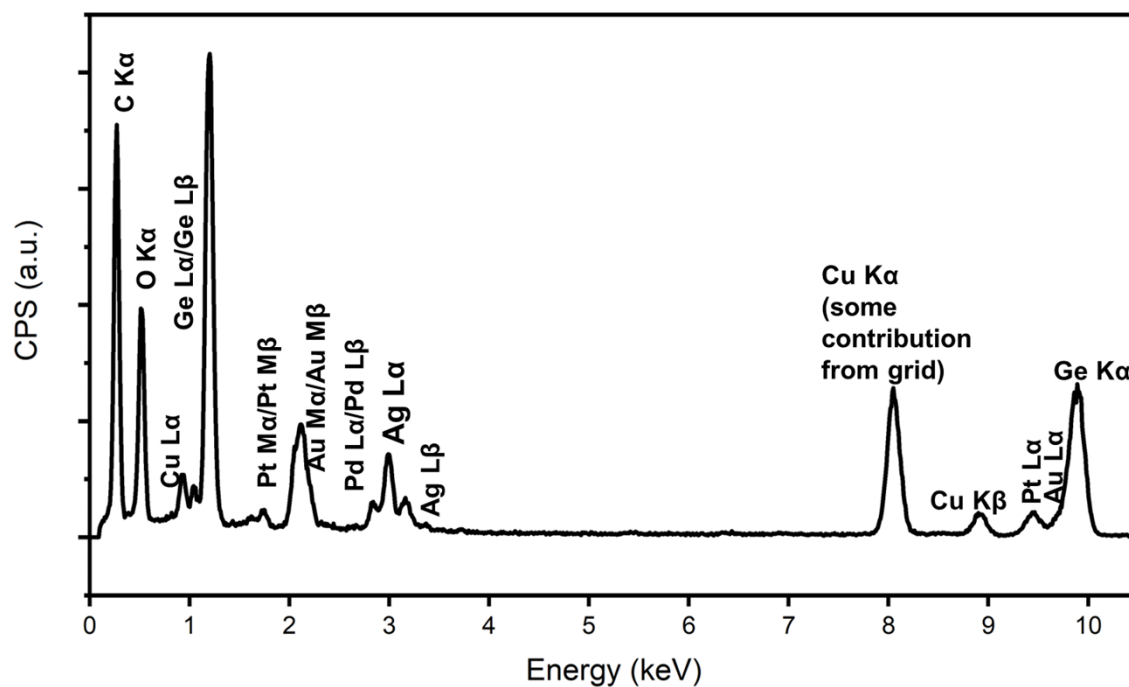

**Figure S23.** Representative EDX spectrum for HEA NPs@GeNPs.

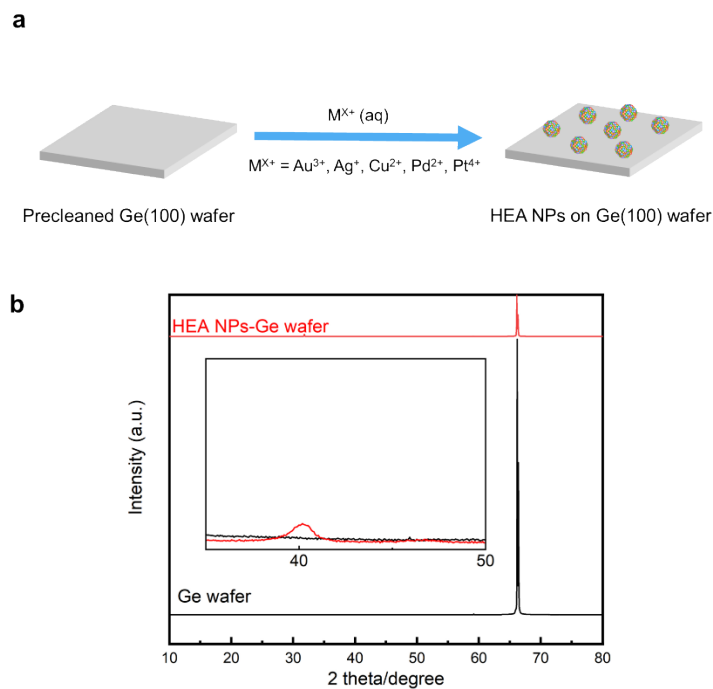

**Figure S24.** (a) Schematic illustration of the deposition of the HEA NPs on Ge(100) wafer. (b) XRD patterns of HEA NPs-Ge wafer and Ge(100) wafer.

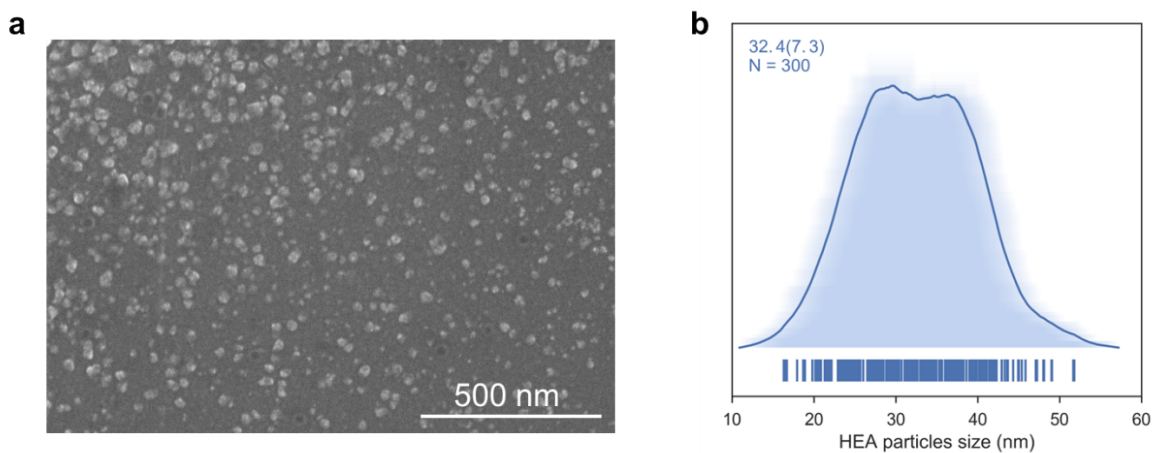

**Figure S25.** Representative (a) SEM image of HEA NPs-Ge wafer and (b) average shifted histogram for HEA NPs.



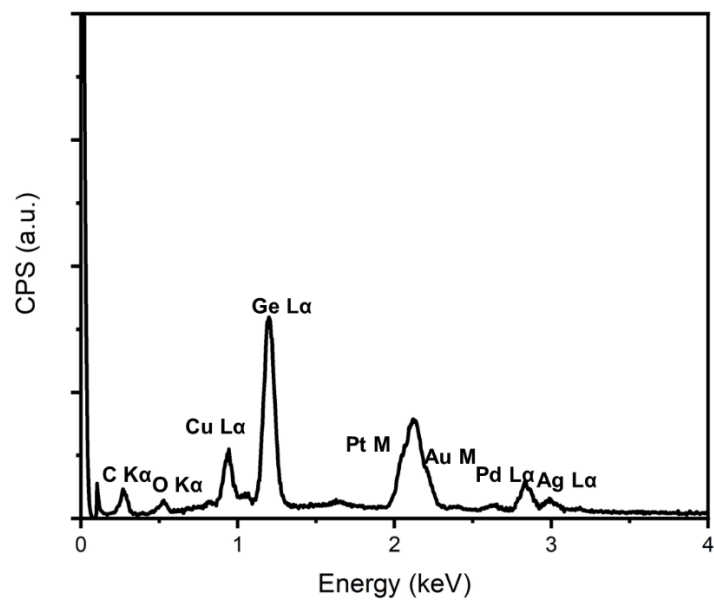

**Figure S26.** Representative SEM/EDX spectrum for HEA NPs-Ge wafer.

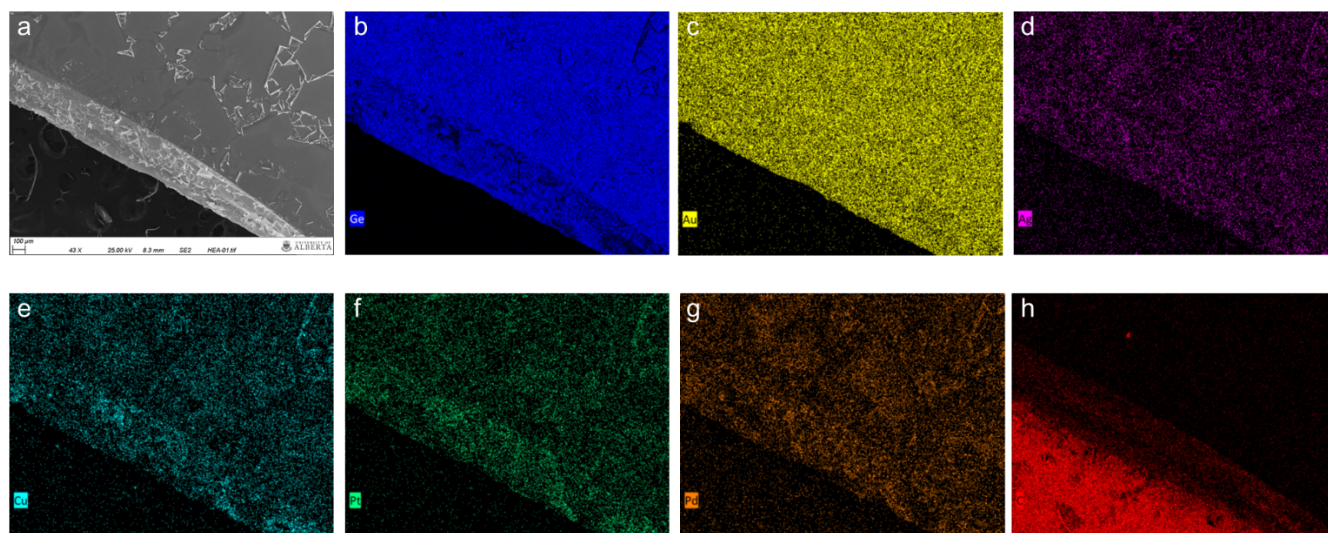

**Figure S27.** (a) Representative SEM image and (b-h) EDX mapping for HEA NPs-Ge wafer.

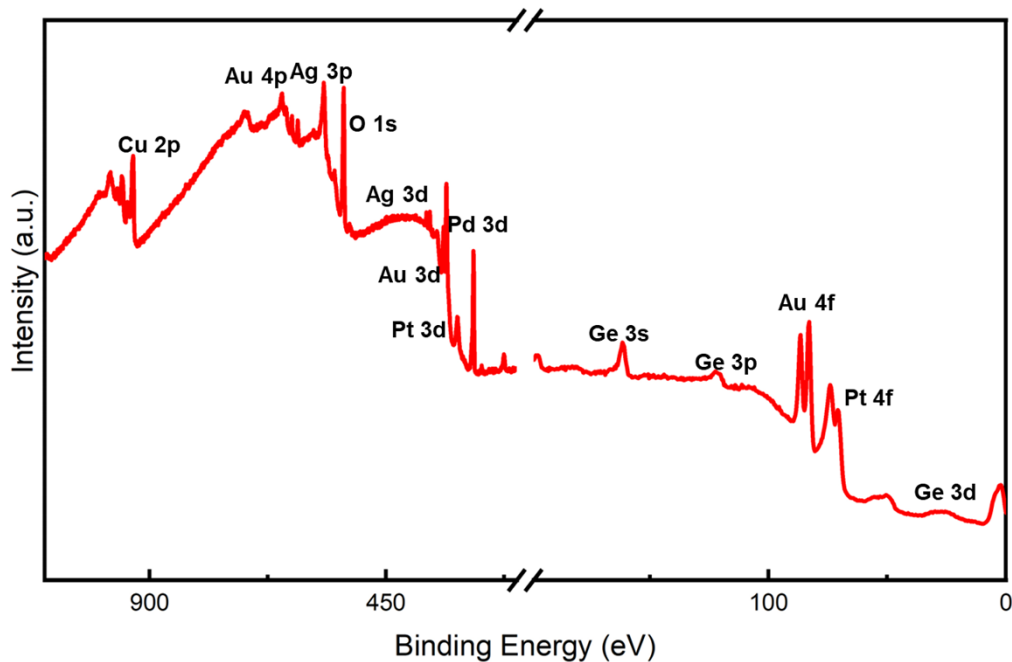

**Figure S28.** Representative survey XP spectrum of HEA NPs-Ge wafer.

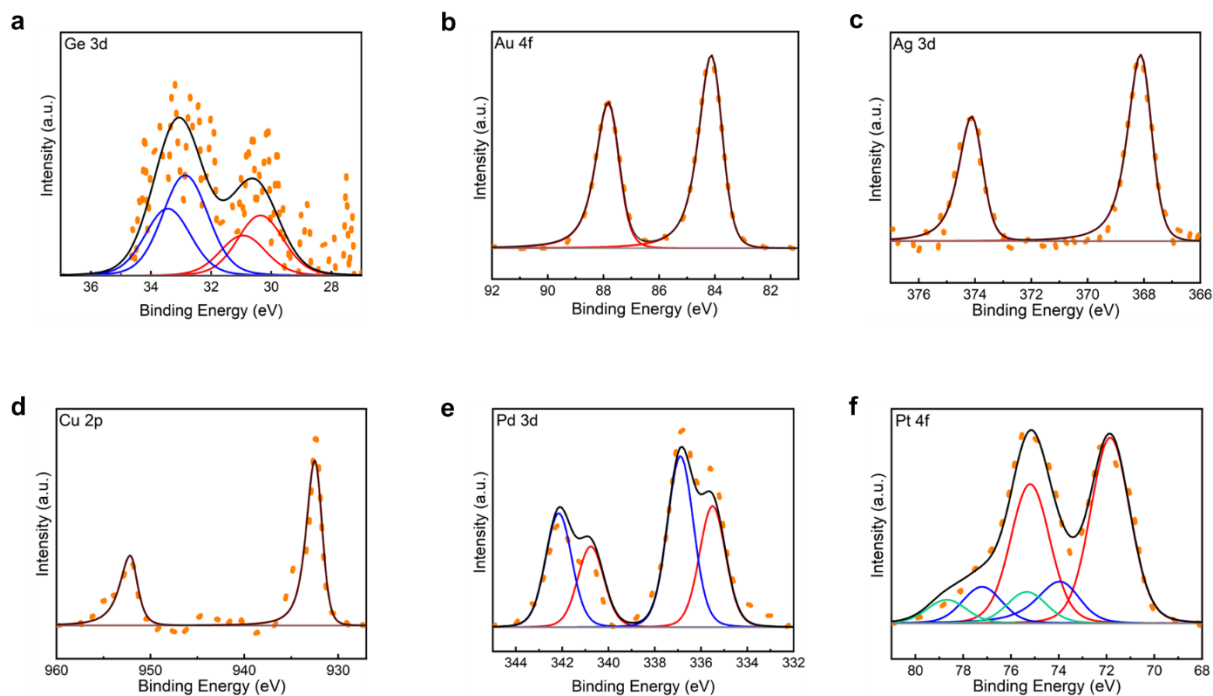

**Figure S29.** Representative high-resolution XP spectra of HEA NPs-Ge wafer: (a) Ge 3d, (b) Au 4f, (c) Ag 3d, (d) Cu 3d, (e) Pd 3d and (f) Pt 4f regions.

**Table S4.** Summary of XPS data for HEA NPs-Ge wafer

|                                         | Ge 3d | Au 4f | Ag 3d | Cu 2p | Pd 3d | Pt 4f |
|-----------------------------------------|-------|-------|-------|-------|-------|-------|
| Emission (eV)                           | 31.3  | 83.7  | 368.0 | 932.4 | 335.5 | 70.8  |
| Reference<br>emission (eV) <sup>a</sup> | 29.8  | 84.0  | 368.2 | 933.0 | 335.0 | 71.0  |
| Atomic<br>percentage (%)                | 9.27  | 6.53  | 4.97  | 5.39  | 5.79  | 5.64  |

<sup>a</sup> Reference metal emissions are from NIST X-ray Photoelectron Spectroscopy Database.<sup>1</sup>

### References

1. NIST X-ray Photoelectron Spectroscopy Database, NIST Standard Reference Database Number 20, National Institute of Standards and Technology, Gaithersburg MD, 20899 (2000)
